# Supplementary material for: Magnetic Separation and Enrichment of Fe–Ti Oxides from Iron Titaniferous Beach Sands: Process Design Applied to Coastal Ecuador
Source: MDPI journal article supplement (doi:10.3390/resources11120121), 2022-12-14
Supplement: s1 [file s1]

Archive with 1 entries (1 files):
- resources-1878370-supplementary.pdf
